1           **Identification of microRNA clusters cooperatively acting on Epithelial to**  
2           **Mesenchymal Transition in Triple Negative Breast Cancer**

3

4 Cantini L<sup>1,2,3,4#</sup>, Bertoli G<sup>5#</sup>, Cava C<sup>5</sup>, Dubois T<sup>1,2,6</sup>, Zinovyev A<sup>1,2,3,4</sup>, Caselle  
5 M<sup>7</sup>, Castiglioni I<sup>5\*</sup>, Barillot E<sup>1,2,3,4</sup>, Martignetti L<sup>1,2,3,4\*</sup>

6

7 1 Institut Curie, 26 rue d'Ulm, F-75005 Paris, France

8 2 PSL Research University, F-75005 Paris, France

9 3 Inserm, U900, F-75005, Paris France

10 4 Mines Paris Tech, F-77305 cedex Fontainebleau, France

11 5 Institute of Molecular Bioimaging and Physiology, National Research Council (IBFM-CNR)  
12 Italy

13 6 Institut Curie, PSL Research University, Department of Translational Research, Breast  
14 Cancer Biology Group - Paris, France

15 7 Department of Physics and INFN, Università degli Studi di Torino - Turin, Italy

16

17 # Contributed equally

18 \* Corresponding Authors

19

20 **Abstract**

21 MicroRNAs play important roles in many biological processes. Their aberrant  
22 expression can have oncogenic or tumor suppressor function directly participating to  
23 carcinogenesis, malignant transformation, invasiveness and metastasis. Indeed,  
24 miRNA profiles can distinguish not only between normal and cancerous tissue but  
25 they can also successfully classify different subtypes of a particular cancer.

26 Here, we focus on a particular class of transcripts encoding polycistronic miRNA  
27 genes that yields multiple miRNA components. We describe clustered MiRNA  
28 Master Regulator Analysis (ClustMMRA), a fully redesigned release of the MMRA  
29 computational pipeline (MiRNA Master Regulator Analysis), developed to search for  
30 clustered miRNAs potentially driving cancer molecular subtyping. Genomically  
31 clustered miRNAs are frequently co-expressed to target different components of pro-  
32 tumorigenic signalling pathways. By applying ClustMMRA to breast cancer patient  
33 data, we identified key miRNA clusters driving the phenotype of different tumor  
34 subgroups. The pipeline was applied to two independent breast cancer datasets,  
35 providing statistically concordant results between the two analysis. We validated in  
36 cell lines the miR-199/miR-214 as a novel cluster of miRNAs promoting the triple  
37 negative subtype phenotype through its control of proliferation and EMT.

38

## 39 **1. Introduction**

40 MicroRNAs (miRNAs) are small RNA molecules emerged as important regulators of  
41 gene expression at the post-transcriptional level. They have been shown to be  
42 involved in the regulation of all essential functions of the cells from differentiation and  
43 proliferation to apoptosis<sup>1</sup>. Each miRNA possesses hundreds of target genes, and a  
44 single gene can be targeted by several miRNAs<sup>2</sup>, giving rise to complex interaction  
45 networks, currently very partially characterized.

46 Multiple studies demonstrated the importance of miRNAs in all the cancer hallmarks  
47 defined by Hanahan and Weinberg<sup>3</sup> and indicated that they might function as  
48 oncogenes or tumor suppressors<sup>4-7</sup>. Further experimental evidences suggested that  
49 specific miRNAs may also have a role beyond the cancer onset and directly  
50 participate in cancer invasiveness and metastasis<sup>6,8</sup>. Indeed, miRNA profiles can  
51 distinguish not only between normal and cancerous tissue but they can also  
52 successfully classify different subtypes of a particular cancer<sup>9,10</sup>, notably of breast  
53 cancer<sup>11-13</sup>.

54 In this work, we focused our attention on a particular class of transcripts  
55 encoding polycistronic miRNA genes that yields multiple miRNA components. A  
56 famous example of this class of transcripts is the mir-17/92 polycistronic oncogene  
57 that plays a role in the development of various cancer types, especially in their most  
58 aggressive form<sup>14</sup>. Genomically clustered miRNAs of mir-17/92 are simultaneously  
59 expressed and target different components of the signaling cascade as well as the  
60 downstream effectors of pro-tumorigenic signalling pathways<sup>15-17</sup>. Deep sequencing  
61 of triple negative breast cancer (TNBC) samples revealed a threefold increase of  
62 miR-17/92 levels<sup>12</sup>. Other studies in breast cancer have shown that mir-106b/25  
63 cluster activates TGF- $\beta$  signaling and epithelial-mesenchymal transition (EMT)<sup>18</sup> and  
64 miR-221/222 cluster is a key regulator of luminal breast cancer tumor progression<sup>19</sup>.

65

66 Since more than 30% of annotated human miRNAs are organized in genomic  
67 clusters, we can expect to find other oncogenic / tumour suppressor polycistronic  
68 miRNAs that are co-expressed to jointly regulate molecular pathways involved in  
69 cancer malignancy. Existing computational approaches for the identification of  
70 master miRNA regulators involved in cancer onset and subtyping are typically  
71 designed to detect the effect of a single miRNA (see review in<sup>20</sup>). However, miRNAs  
72 have been shown to frequently act in a combined manner, jointly regulating proteins

73 in close proximity of the protein-protein interaction network<sup>21</sup> and functionally related  
74 genes<sup>22-25</sup>. The underlying assumption of this work is that this mode of action might  
75 be true also for genomically clustered miRNAs. Indeed, it has already been shown  
76 that clustered miRNAs carry out pervasive cotargeting<sup>26</sup>.

77 Here we present Clustered MiRNA Master Regulator Analysis (ClustMMRA), a fully  
78 redesigned release of the MiRNA Master Regulator Analysis (MMRA)<sup>25,26</sup> pipeline,  
79 developed to search for clustered miRNAs potentially driving cancer subtyping.  
80 MMRA was designed for miRNA underlying tumor subtypes, a comparison  
81 characterized by much lower variation than cancer versus normal conditions. The  
82 results of the MMRA pipeline were experimentally validated, proposing a set of four  
83 miRNAs predicted to drive the stem-like aggressive colorectal cancer subtype<sup>27</sup>.

84 ClustMMRA extends MMRA to a model in which multiple miRNAs belonging to the  
85 same genomic cluster coordinately target functionally related genes driving the  
86 phenotype of a particular cancer subtype. As the MMRA pipeline, ClustMMRA is a  
87 multi-step workflow that requires in input miRNA/mRNA expression profiles from  
88 matched tumor samples classified in different subtypes according to subtype-specific  
89 gene signatures. The final output of ClustMMRA provides key miRNA clusters  
90 contributing to the regulation of particular subtypes of the disease.

91 We tested this novel pipeline to search for oncogenic / tumour suppressor  
92 polycistronic miRNAs driving breast cancer subtypes. ClustMMRA was applied to  
93 two independent breast cancer datasets whose samples were previously classified  
94 into four subtypes (luminal A, luminal B, HER2+ and triple negative). We obtained  
95 statistically concordant results between the two analysis, identifying five clusters of  
96 miRNAs with aberrant expression in a specific subtype of both datasets. Among  
97 them, miR-199a/214 on chromosome 1 was found to be down-regulated in the triple  
98 negative subtype and associated to EMT regulation. Functional validation in cell lines  
99 confirms the regulatory effect of this cluster in shaping the triple negative subtype  
100 phenotype through its control of proliferation and EMT. Overall, our computational  
101 pipeline and experimental validations characterize a new genomic cluster of miRNAs  
102 implicated in the TNBC phenotype that might be further explored in diagnosis and  
103 therapeutic strategies. In addition, we evinced a cooperative mechanism for the  
104 regulatory activity of genomically clustered miRNAs.

105

## 106 **2. Results**

107

## 108 **2.1 From single miRNA to clusters of miRNAs: ClustMMRA**

109 The MMRA pipeline is here extended to search for genomically co-clustered miRNAs  
110 potentially driving cancer subtyping. Similar to MMRA, the workflow of ClustMMRA  
111 (see Figure 1) consists of subsequent filtering steps: (i) differential expression  
112 analysis of clustered miRNAs; (ii) target enrichment analysis and (iii) network  
113 analysis. While a miRNA cluster is usually transcribed as a single unit<sup>28-32</sup>, the  
114 expression of mature miRNAs in the same cluster might not be highly correlated due  
115 to regulatory events in the maturation processes<sup>28,31</sup>.

116 Clusters of miRNAs are identified based on their genomic organization as reported in  
117 Methods. In step (i), the subtype-specific expression of each miRNA is assessed by  
118 Kolmogorov-Smirnov (KS) statistical test and fold change cutoff. Clusters having at  
119 least two miRNAs with subtype-specific expression change in the same direction  
120 (both up-regulated or down-regulated) are selected for step (ii).

121 In step (ii), we extract miRNA clusters having their predicted targets enriched for the  
122 gene signature of the corresponding subtype. Only miRNAs of the cluster classified  
123 as differentially expressed in step (i) are considered in step (ii). The targets of  
124 individual miRNAs have been predicted using four different databases (miRTarBase  
125 2.5, doRiNA-PicTar 2012, microRNA.org 2010, PITA 2007 and TargetScan 7.1),  
126 requiring the prediction by at least two of them. The set of targets of a cluster has  
127 been defined as the union of the targets of individual miRNAs. The objective of step  
128 (i) and (ii) is to identify co-clustered and co-expressed miRNAs potentially regulating  
129 a gene expression signature in a joint manner, without necessarily having a high  
130 overlap in terms of target genes<sup>23</sup>. Finally, in step (iii) a miRNA-mRNA interaction  
131 network is constructed for each selected cluster using the ARACNE algorithm<sup>33,34</sup>. In  
132 this step, we identify modules of co-clustered miRNAs and interacting genes,  
133 including indirect interactions, that are believed to participate in the phenotype of a  
134 given cancer subtype (we call these modules *regulons*). Unlike the results of the  
135 MMRA pipeline, in which *regulons* can include only one miRNA, the ones identified  
136 by the ClustMMRA pipeline contain multiple miRNAs of the genomic cluster.  
137 Interference of indirect interactions may introduce links between miRNAs and  
138 spurious genes in the *regulon*. A Fisher's exact test has been performed to evaluate  
139 the statistical significance of the overlap between the genes included in each *regulon*  
140 and the gene signature of the associated subtype.

141

## 142 **2.2 Identification of regulatory miRNA clusters underlying breast cancer** 143 **subtypes**

144 We applied ClustMMRA to identify polycistronic miRNAs underlying breast cancer  
145 molecular subtypes. For this study, two independent datasets were used, a first  
146 paired miRNA/mRNA expression dataset from a in-house cohort of 129 breast  
147 carcinoma tumour samples (which we refer to as Curie dataset<sup>35,36</sup> and a second  
148 dataset from The Cancer Genome Atlas project composed of 397 samples<sup>37</sup>. In both  
149 datasets, individual samples were assigned to four subtypes (luminal A, luminal B,  
150 HER2+ and triple negative) based on the immunohistochemical staining of estrogen  
151 (ER), progesterone (PR) and HER-2 (ERBB2) receptors.

152

### 153 **2.2.1 ClustMMRA application to Curie and TCGA datasets**

154 Expression data required for running ClustMMRA were pre-processed as described  
155 in Methods and the signatures for breast cancer subtypes were defined using the  
156 approach proposed in<sup>38</sup> (see Methods). We applied the ClustMMRA pipeline on  
157 Curie and TCGA datasets separately. In the first step, genomically co-clustered  
158 miRNAs having a subtype-specific expression were identified. In this step, 28 and 47  
159 out of 131 analyzed clustered miRNAs were selected for Curie and TCGA datasets,  
160 respectively (see Supplementary Table S1). Of these, 18 clusters were in common  
161 between the two datasets ( $p$ -value $<7e-04$ ), revealing a significantly concordant  
162 expression pattern of co-clustered miRNAs. Among these co-clustered and co-  
163 expressed miRNAs, some are differentially expressed in multiple subtypes (18 and  
164 37 clusters for Curie and TCGA respectively), with 15 out of 18 and 21 out of 37  
165 differentially expressed in basal-like and luminal A with opposite sign.

166 In step (ii), 10 out of 28 (Curie) and 16 out of 47 (TCGA) subtype-specific miRNA  
167 clusters were found to have their predicted targets enriched in genes belonging to  
168 the corresponding gene signature. The output of step (ii) (see Supplementary Table  
169 S2) has an intersection of 7 elements between the two datasets ( $p$ -value  $<1e-05$ ). In  
170 the step (iii) of ClustMMRA, a *regulon* for each miRNA cluster selected in step (ii)  
171 was constructed. The *regulons* were tested for enrichment in gene signature. 7 out of  
172 10 and 9 out of 16 clusters passed this last selection step in Curie and TCGA  
173 datasets, respectively. These clusters constitute the final output of ClustMMRA and  
174 are reported in Table 1. After this last step, the output in common between the two

175 datasets contains 5 clusters ( $p$ -value  $< 8e-06$ ). The significant overlap between  
 176 results obtained from the analysis of two independent datasets with ClustMMRA  
 177 supports the reliability of this approach. Notably, the results have an intersection with  
 178 increasing statistical significance at each step of the pipeline. This trend confirms the  
 179 accuracy of the proposed pipeline in selecting candidate clusters underlying cancer  
 180 subtypes.

181 Some results obtained with ClustMMRA in the breast cancer study have already  
 182 been validated in the literature. MiR-493/136 and miR-379/656 clusters in the  
 183 chromosomal region 14q32 have been reported as tumor suppressors in different  
 184 types of human cancer<sup>39–41</sup>, including breast cancer<sup>42</sup>. Silencing of multiple miRNAs  
 185 encoded in these clusters was shown to increase the proliferation and invasion of  
 186 ovarian<sup>43</sup>, melanoma<sup>44</sup> or oral squamous carcinoma<sup>39</sup> cells. The X-chromosome-  
 187 located miR-532/502 cluster has been previously associated to cancer. In particular,  
 188 this was found up-regulated in triple-negative breast cancer cells<sup>45</sup> and the regulatory  
 189 circuit miR-502/H4K20 methyltransferase SET8 was described as a key regulator of  
 190 breast cancer pathobiology<sup>46</sup>.

191

192 **Table 1. Clusters of miRNAs identified by ClustMMRA in breast cancer TCGA**  
 193 **and/or Curie datasets.**

| Cluster of miRNAs | Chromosome position | Number of deregulated miRNAs in the cluster | Cluster expression in subtypes | Gene signature expression in subtypes | Dataset results |
|-------------------|---------------------|---------------------------------------------|--------------------------------|---------------------------------------|-----------------|
| miR-199a/214      | Chr1                | 3                                           | Down in Basal-like             | Up in Basal-like                      | Curie and TCGA  |
| miR-493/136       | Chr14               | 8                                           | Down in Basal-like             | Up in Basal-like                      | Curie and TCGA  |
| miR-379/656       | Chr14               | 42                                          | Down in Basal-like             | Up in Basal-like                      | Curie and TCGA  |
| miR-512/373       | Chr19               | 46                                          | Up in Basal-like               | Up in Basal-like                      | Curie and TCGA  |
| miR-532/502       | ChrX                | 8                                           | Up in Basal-like               | Down in Basal-like                    | Curie and TCGA  |
| miR-449a/449c     | Chr5                | 3                                           | Down in Basal-like             | Down in Basal-like                    | TCGA            |
| miR-653/489       | Chr7                | 2                                           | Down in Basal-like             | Down in Basal-like                    | TCGA            |
| miR-548aa/548d    | Chr8                | 2                                           | Up in Basal-like               | Down in Basal-like                    | TCGA            |
| miR-421/374c      | ChrX                | 3                                           | Up in Basal-like               | Up Basal-like                         | TCGA            |
| miR-99a/let-7c    | Chr21               | 2                                           | Down in Basal-like             | Up Basal-like                         | Curie           |
| miR-450b/424      | ChrX                | 6                                           | Down in Basal-like             | Up Basal-like                         | Curie           |

194

195 **2.2.2 Comparison of ClustMMRA with the pipeline for the identification of**  
196 **single master miRNA regulators (MMRA)**

197 We compared the results of ClustMMRA in the breast cancer study with those  
198 obtained by applying to the same dataset the MMRA pipeline for the identification of  
199 single master miRNA regulators. The goal is to investigate if the regulatory effect of a  
200 cluster can be detected by studying the effect of individual miRNAs belonging to the  
201 same cluster.

202 We applied MMRA to the Curie dataset, using in each step the same thresholds  
203 employed for ClustMMRA. If at least two miRNAs of a given cluster are included in  
204 the output of MMRA, we consider this cluster as detected in the single-miRNA  
205 pipeline. Interestingly, 4 out of 7 clusters detected by ClustMMRA (miR-199a/214,  
206 miR-493/136, miR-512/373 and miR-450b/424) were not detected by MMRA.

207 This difference between the output of the two pipelines is given by the target  
208 enrichment analysis in step (ii) and the network analysis in step (iii). In fact, the 4  
209 clusters missing in the final output of MMRA are included in the output of step (i),  
210 since they have at least 2 differentially expressed miRNA genes. They are filtered  
211 out in step (ii) since no miRNA gene in these clusters, when analyzed individually,  
212 reaches a significant enrichment of signatures genes in its targets for a certain  
213 subtype. This observation supports the hypothesis that co-clustered miRNAs  
214 participate in regulating the gene expression signature of a given cancer subtype  
215 without necessarily having a high overlap in terms of common target genes.

216

217 **2.2.3 Prioritization of miRNA clusters for functional validation in cell lines**

218 Before experimental validation of the ClustMMRA output, prioritization of results was  
219 performed. We considered the 5 clusters identified both in TCGA and Curie datasets.  
220 For the *regulons* associated to each cluster, the nodes present in both TCGA and  
221 Curie datasets were kept, obtaining a network for each *regulon* with size of about  
222 100 nodes. Then, biological processes and pathways associated to these *regulons*  
223 were identified through Fisher's exact enrichment test, using MSigDB <sup>47</sup> as reference  
224 collection of signatures for pathways and biological functions. The complete list of  
225 MSigDB pathways resulting from this analysis (FDR < 0.05) is reported in  
226 Supplementary Table S3.

227 Overall, the network analysis shows a regulation of EMT, stemness and extracellular  
228 matrix by clusters miR-493/136, miR-379/656 and miR-199a/214. Cluster miR-

229 532/502 is predicted to regulate proliferation and the cell cycle transition from G to M  
230 phases. All the *regulons* have been found associated to breast cancer specific  
231 signatures, with clusters miR-493/136, miR-379/656 and miR-199a/214 sharing 9 of  
232 them

233 (“SCHUETZ\_BREAST\_CANCER\_DUCTAL\_INVASIVE\_UP”, “FARMER\_BREAST\_C  
234 ANCER\_CLUSTER\_4”, “TURASHVILI\_BREAST\_LOBULAR\_CARCINOMA\_VS\_LOB  
235 ULAR\_NORMAL\_DN”, “CHARAFE\_BREAST\_CANCER\_LUMINAL\_VS\_MESENCHY  
236 MAL\_DN”, “LANDIS\_BREAST\_CANCER\_PROGRESSION\_DN”, “LANDIS\_ERBB2\_B  
237 REAST\_TUMORS\_324\_DN”, “LIEN\_BREAST\_CARCINOMA\_METAPLASTIC”, “TUR  
238 ASHVILI\_BREAST\_DUCTAL\_CARCINOMA\_VS\_DUCTAL\_NORMAL\_UP”, “TURAS  
239 HVILI\_BREAST\_LOBULAR\_CARCINOMA\_VS\_DUCTAL\_NORMAL\_UP”, “TURASH  
240 VILI\_BREAST\_LOBULAR\_CARCINOMA\_VS\_LOBULAR\_NORMAL\_DN”). Invasive  
241 and mesenchymal state signatures confirm the association of these clusters to the  
242 basal-like subtype. Other general processes were found enriched in the regulons of  
243 these clusters: EMT (including the  
244 “HALLMARK\_EPITHELIAL\_MESENCHYMAL\_TRANSITION” signature and multiple  
245 GO terms related to the extracellular matrix), stemness  
246 (“BOQUEST\_STEM\_CELL\_UP”, “LIM\_MAMMARY\_STEM\_CELL\_UP”, “IZADPANA  
247 H\_STEM\_CELL\_ADIPOSE\_VS\_BONE\_DN” signatures), cell cycle  
248 (“IGLESIAS\_E2F\_TARGETS\_UP”) and angiogenesis  
249 (“GO\_VASCULATURE\_DEVELOPMENT”, “GO\_CIRCULATORY\_SYSTEM\_DEVEL  
250 OPMENT”). Finally, the regulon of cluster miR-532/502 was found enriched in some  
251 breast cancer specific signatures clearly linking it to the basal-like subtype  
252 (“SOTIRIOU\_BREAST\_CANCER\_GRADE\_1\_VS\_3\_UP”, “FARMER\_BREAST\_CAN  
253 CER\_BASAL\_VS\_LULMINAL” and “POOLA\_INVASIVE\_BREAST\_CANCER\_UP”).  
254 Also, it was observed to be strongly associated to proliferation signatures (e.g.  
255 “ZHOU\_CELL\_CYCLE\_GENES\_IN\_IR\_RESPONSE\_24HR”, “GO\_MITOTIC\_NUCL  
256 EAR\_DIVISION”, “GO\_MITOTIC\_CELL\_CYCLE”, “GO\_CHROMOSOME\_SEGREGA  
257 TION”, “GO\_CELL\_DIVISION”, “GO\_CELL\_CYCLE\_PROCESS”, “CHANG\_CYCLING  
258 \_GENES”).

259 We focused on EMT regulation by miR-199a/214 as an interesting phenotype to  
260 validate in basal-like subtype. MiR-199a/214 is the smallest cluster that controls  
261 EMT, in terms of miRNA genes. Considering the technical difficulty in producing the



262 over-expression of multiple miRNAs in cell lines, this was chosen as the best  
263 candidate to study the combinatorial regulation by co-clustered miRNAs.

#### 264 **2.2.4 MiR-199a/miR-214 cluster is underexpressed in TNBC cells**

265 Human miR-199a/miR-214 cluster is encoded by a large non-coding RNA on  
266 chromosome 1q24 which produces three mature miRNAs (hsa-miR-199a-5p, hsa-  
267 miR-199a-3p and hsa-miR-214). First, we examined by quantitative RT-PCR the  
268 expression of the individual mature miRNAs belonging to this cluster in T47D and  
269 MDA-MB-231 cells, which are luminal A and TNBC cells respectively<sup>48</sup>. Results show  
270 that the three mature miRNAs encoded by the miR-199a/miR-214 cluster are  
271 significantly underexpressed in MDA-MB-231 compared to T47D cells (Fig.3).

#### 272 **2.2.5 Upregulation of miR-199a/miR-214 cluster decreases TNBC cell** 273 **proliferation**

274 To test whether the deregulation of miR-199a/miR-214 cluster was sufficient to  
275 impact TNBC cells phenotype, MDA-MB-231 cells were treated with sense (S)  
276 oligonucleotides encoding for all the three miRNAs of the cluster (miR-214, miR-  
277 199a-5p, miR-199-3p) or scramble negative controls. We checked the  
278 overexpression of each miRNA of the cluster after transfection by RT-PCR analysis,  
279 shown in Fig.4A-C. After confirming the upregulation of single miRNA or all three  
280 miRNAs of the cluster in MDA-MB-231, we analyzed the effect of miRNA  
281 overexpression on proliferation: individual miRNAs, except miR-199a-3p, and entire  
282 miR-199a/miR-214 cluster overexpression reduce the MDA-MB-231 cell number  
283 compared to scramble or untreated control (Fig. 5).

#### 284 **2.2.6 MiR-199a/miR-214 cluster silencing is associated with EMT-like and** 285 **invasive phenotype**

286 According to bioinformatic analysis, miR-199a/miR-214 cluster is predicted to  
287 modulate EMT genes and cell invasion. To investigate if the expression of this  
288 cluster affects the molecular profile of the cells, we analyzed the expression levels of  
289 EMT-related genes upon upregulation of a single miRNA of the cluster or the whole  
290 cluster through S oligonucleotide treatment. We observed a reduction of EMT marker  
291 genes upon both individual miRNAs or entire miR-199a/miR-214 cluster  
292 overexpression (Fig.6), as demonstrated by the increase expression of epithelial

293 markers E-cadherin and Beta-catenin and a decrease of the expression level of the  
294 mesenchymal marker Slug.

295 Finally, we used an *in vitro* culture system developed to assess mammary cell  
296 propagation in non-adherent, non-differentiated culture conditions and their ability to  
297 form discrete clusters of cells termed mammospheres<sup>49</sup>. The ability of the cells to  
298 form mammosphere could be considered also a marker of the stemness of the cell  
299 population<sup>49</sup>. The formation of such spheroids increases with EMT induction (PMID:  
300 18485877). Our experiments on MDA-MB-231 cells show that the expression of miR-  
301 199a/miR-214 cluster is sufficient to compromise mammosphere formation efficiency  
302 (Fig.7). In fact, when we overexpressed either miR-214 or miR-199a-5p or miR-  
303 199a-3p and the three miRNAs together, we observed a decrease efficacy in  
304 mammosphere formation in respect to untreated cells.

305

### 306 **3. Discussion**

307 Over the last two decades there has been an explosion of research focused on  
308 miRNAs involvement in cancer initiation and progression, pointing out the potential of  
309 these small RNAs as biomarkers for diagnosis, prognosis and response to treatment.  
310 However, the majority of computational and experimental approaches for the  
311 identification of master miRNA regulators involved in cancer onset and subtyping are  
312 typically designed to detect the regulatory effect of a single miRNA. This can be a  
313 limitation in identifying regulation by multiple miRNA species acting cooperatively on  
314 cellular pathways and pathological changes.

315 The computational pipeline here described, ClustMMRA, was specifically designed  
316 to search for genomically clustered miRNAs potentially driving cancer subtyping.  
317 ClustMMRA provides a computational framework to systematically investigate  
318 polycistronic miRNA transcripts involved in cancer subtyping or possibly in other  
319 biological contexts. In practice, the use of ClustMMRA can be generalized in order to  
320 study other classes of cooperatively acting miRNAs than the case of genomic  
321 clusters, such as co-expressed miRNAs from different genomic locations.

322 In our study, ClustMMRA was applied to search for oncogenic / tumour suppressor  
323 polycistronic miRNAs driving breast cancer subtypes, pointing out five novel miRNA  
324 clusters whose regulatory effect is potentially associated to the triple negative  
325 subtype phenotype. Among them, the miR-199/miR-214 is identified as acting on  
326 EMT in TNBC subtype. Our computational and experimental validation of the

327 regulatory effect of miR-199/miR-214 show that the down-regulation of this genomic  
328 cluster is associated to appearance of EMT-like phenotype in the TNBC cells. The  
329 upregulation of individual miRNAs belonging to the cluster or the entire cluster  
330 decreases the expression of a marker of mesenchymal phenotype (i.e., Slug) and  
331 increases the expression of epithelial markers (E-cadherin and Beta-catenin). These  
332 changes towards an epithelial phenotype, obtained by overexpression on miR-  
333 199/miR-214 cluster, diminished the capability of the stem population of MDA-MB-  
334 231 lineage of forming mammospheres in suspension. The presence of cancer stem  
335 cells has been linked to poor cancer patient survival, as those tumors with a high  
336 percentage of cancer stem cells are capable of migrating, invading and colonizing  
337 surrounding tissues, surviving in suspension, and creating a secondary tumor<sup>50</sup>. Our  
338 results suggest that this cluster of miRNAs is possibly involved in the maintenance of  
339 more aggressive phenotype of breast cancer, by controlling the stemness of the  
340 population, regulating EMT target genes, and cell proliferation. Finally, our study  
341 supports a the hypothesis of miRNA cooperativity from a polycistronic transcript as a  
342 possible mechanism of jointly targetting to act on molecular pathways involved in  
343 cancer malignancy and subtyping. More accurate measurements and quantitative  
344 study might improve the understanding of this cooperative effects.

345

## 346 **4. Methods**

### 347 **4.1 MiRNA cluster annotation**

348 The genomic locations of miRNAs were retrieved from miRBase v18<sup>51</sup>. Similar to  
349 previous studies<sup>52,53</sup>, co-clustered miRNAs are defined as miRNA genes located  
350 within 10 Kb of distance on the same chromosome and in the same strand.

351

### 352 **4.2 Datasets preprocessing**

353 Breast cancer (BRCA) RNA-seq and miRNA-seq Level 3 expression profiles were  
354 downloaded from The Cancer Genome Atlas (TCGA) in January 2016. Only those  
355 primary tumors profiled for both mRNA and miRNA expression were included in the  
356 analysis, obtaining a total of 397 samples. Two expression matrices (one for mRNAs  
357 and the second for miRNAs) were normalized obtaining the paired mRNA/miRNA  
358 expression dataset here referred to as TCGA. The Curie dataset was generated with  
359 microarray technologies (Agilent miRNA microarray kit V3 for miRNAs and Affymetrix  
360 U133plus2 for mRNA) and pre-processed following the procedure described in<sup>54</sup>.

## 361 **4.2 Definition of a gene signature for each breast cancer subtype**

362 The ClustMMRA pipeline requires as input a gene signature for each disease  
363 subtype. Available signatures for breast cancer subtypes, such as the PAM50<sup>55</sup>,  
364 were not applicable here due to their limited size in terms of number of genes. We  
365 thus defined the signatures for our breast cancer study using the approach proposed  
366 in<sup>38</sup>. The Curie dataset was used for signature construction, while the TCGA dataset  
367 was employed for signature validation. Differential gene expression for each subtype  
368 vs. all the other samples was computed by Student's t-test and log fold change cutoff  
369 (t-test adjusted p-value < 0.05 and absolute(log fold change) > 0.5). Moreover, to  
370 increase the predictive power of the constructed signatures, those genes associated  
371 to more than one class according to the previous criteria, or having a difference  
372 between the first and second highest absolute(log fold changes) lower than 0.2 were  
373 discarded. The choice of thresholds was optimized to maximize the gene association  
374 to a unique subtype and the number of genes included in each signature (on  
375 average 117 genes per signature). For each subtype, two separated signatures were  
376 defined ("down" and "up"), based on the sign of the expression change of their  
377 genes. The signatures constructed in this way are available in Supplementary Table  
378 S4. The reliability of these signatures were tested in two ways. First, their  
379 classification performances were validated on TCGA data. We classified the TCGA  
380 samples using our signatures with the Nearest Template Prediction (NTP) method<sup>56</sup>,  
381 as done in<sup>57,58</sup>. Only 44 out of 397 (11%) samples resulted to be misclassified. Then,  
382 the significance of the intersection between our signatures and publicly available  
383 ones was evaluated by a Fisher's exact test. The signatures used for this test were  
384 obtained from MSigDB<sup>47</sup> plus a specific one derived from<sup>59</sup>. The proliferation  
385 signatures were added to test the basal-like subtype, known to be associated to a  
386 strong proliferative signal. Highly significant p-values were obtained for the  
387 intersection between our newly defined signatures and previously published ones for  
388 the same breast cancer subtypes. The above results confirm the classification  
389 performances and reliability of the breast cancer signatures here constructed.

390

## 391 **4.3 Cell culture and miRNA modulation**

392 For *in vitro* studies, we used two human BC epithelial cell lines: T47D and MDA-MB-  
393 231 cells (ICLC-Biologic Bank and Cell Factory, Italy). These cell lines were chosen  
394 as they represent a model of luminal A and TNBC cell lines, respectively<sup>48</sup>. Following

395 the manufacturer's recommendation, we maintained the cell lines within a humidified  
396 atmosphere containing 5% CO<sub>2</sub> at 37 °C in DMEM (for T47D cell line) or advanced  
397 DMEM (for MDA-MB-231 cell line) cell culture medium (Gibco, Life Technologies),  
398 with 10% fetal bovine serum (FBS), 1% penicillin-streptomycin, 2mM glutamine (all  
399 from Lonza, Euroclone). Dulbecco Phosphate-Buffered Saline (D-PBS), trypsin, and  
400 all the media additives were obtained by Lonza (Euroclone).

401 The sense (S) oligonucleotide sequence of each miRNA of the cluster has been  
402 designed following the sequences indicated in miRbase database<sup>51</sup>. S  
403 oligonucleotides were purchased from Sigma.

404 To obtain the upregulation of each miRNA, S oligonucleotides, resuspended in  
405 water, were added three times a day for 3 days directly to the culture medium of the  
406 cells (<50% confluency) at a final concentration of 100nM/day<sup>60</sup>. The cells were  
407 collected 24,48 or 72h of treatment and different assays were performed  
408 (proliferation, mammosphere formation and real time-PCR analysis of miRNAs and  
409 EMT genes).

410

#### 411 **4.3 Proliferation assay**

412 Tumor cell proliferation was assessed by following the protocol described in<sup>61</sup>.  
413 Briefly, cells were seeded at a confluency of 80000 cells/w in 24 well plates. The  
414 cells were added daily with 100nM final concentration of S miR-214, -199a-3p, -  
415 199a-5p. The cells were collected and counted at 24,48 or 72h of treatment. A  
416 graphic representation of the cell counts was obtained by plotting the number of the  
417 total cells at each time point. Experiments were performed three times in triplicate (n  
418 = 9).

419

#### 420 **4.5 Mammospheres preparation**

421 After miRNA treatment cells were collected and seeded in non adherent plastic  
422 plates (100 cells/ml) in DMEM:F12 (1:1) added with 1% penicillin-streptomycin, 2mM  
423 glutamine, 1% HEPES, 10ng/ml bFGF, 20ng/ml B27, 20ng/ml EGF, as described in<sup>62</sup>.  
424 Pictures were taken after 10 days of culture in suspension.

425

#### 426 **4.6 RNA isolation, reverse transcription and RT-PCR analysis**

427 Total RNA was isolated using TRIzol reagent (Life Technologies) following the  
428 manufacturer's recommendations. To obtain cDNA from total RNA for gene

429 expression analysis, two micrograms of total RNA were reverse transcribed using  
430 oligo dT primers in combination with High Capacity cDNA Reverse Transcription kit  
431 (Applied Biosystem), following the manufacturer's protocol.

432 For miRNA analysis, one microgram of total RNA was reverse transcribed using  
433 MystiCq microRNA cDNA synthesis kit (Sigma), following the manufacturer's  
434 protocol, in order to reverse transcribe polyA-tailed miRNA into cDNA.

435 RT-PCR analysis was performed using Power Up Sybr Green Master mix (Applied  
436 Biosystem, Life Technologies) in an Eco RT-PCR machine (Illumina). All the primers  
437 for human mRNA and miRNA amplification were home-made and are described  
438 below (Table xx). miRNA amplification was performed using primers designed on the  
439 mature miRNA sequence taken from miRbase v18<sup>51</sup>. HPRT and miR-103-3p were  
440 used as an internal control for gene expression and miRNA profile analysis,  
441 respectively. Primers used are reported in Supp FileXXX

442 The relative expression of miRNAs and genes was calculated for both T47D and  
443 MDA-MB-231 cell lines with the  $2^{(-\Delta\Delta C_T)}$  method<sup>63</sup>. Experiments were performed three  
444 times in triplicate ( $n = 9$ ). A *t* test was calculated.

445

## 446 5. Figures

447 **Figure 1. Schematic representation of the Clustered microRNA Master**  
448 **Regulator Analysis (ClustMMRA) workflow.** The schema reports the data required  
449 as initial input, the four analytical steps with the respective outputs, and the final  
450 output of the pipeline.

451

452 **Figure 2. Pathways controlled by the deregulated miRNA clusters.** A summary  
453 of the main biological functions controlled by the different miRNA clusters is here  
454 reported. Y-axis of the radarplot corresponds to the sum of the absolute log(p-value)  
455 of all the pathways associated to a given function. A,B,C,D correspond to miR-  
456 199a/214, miR-493/136, miR-379/656 and miR-532/502, respectively.

457

## 458 Fig.3 RT-PCR analysis of miRNA expression in T47D vs MDA-MB-231.

459 T47D (in white) and MDA-MB-231 (in grey) were analyzed for the expression of miR-  
460 214 (A, p-value<0.011), miR-199a-5p (B, p-value<0.003) and miR-199a-3p (C, p-  
461 value<0.03).  $2^{-\Delta\Delta C_T}$  method was used for evaluating the expression level of each

462 miRNA. Average $\pm$ sd of three independent experiments for each cell line are shown.  
463 T-test p-value<0.01(\*\*), <0.05(\*).

464

465 **Fig.4 Mirna modulation in MDA-MB-231 cells.**

466 MDA-MB-231 cells were treated for 48 hours with 100nM sense (S) oligonucleotide  
467 encoding for miR-214, miR-199a-5p, miR-199a-3p or miRNA cluster, respectively.  
468 The expression levels of miR-214 (A), miR-199a-5p (B) and miR-199a-3p (C) were  
469 evaluated by RT-PCR analysis comparing miRNA-treated cells vs untreated cells.  
470 Average $\pm$ sd of three independent experiments for each cell line are shown. T-test p-  
471 value<0.01(\*\*), <0.05(\*).

472

473 **Fig.5 In vitro analysis of miRNA modulation effect on MDA-MB-231 cells  
474 proliferation.**

475 MDA-MB-231 cells were treated for 24,48,72 hours (h) with sense (S)  
476 oligonucleotide encoding for miRNA cluster or single miRNA (miR-214, miR-199a-  
477 5p, miR-199a-3p) or a scramble miRNA. The effect of miRNA modulation on cell  
478 proliferation is shown. Average $\pm$ sd of three independent experiments for each cell  
479 line are shown. T-test p-value<0.001(\*\*\*),<0.01(\*\*), <0.05(\*).

480

481 **Fig.6 Effect of miRNA modulation on EMT marker genes.**

482 MiRNA modulated MDA-MB-231 cells were used for RT-PCR analysis of EMT  
483 marker genes. RT-PCR analysis shows the effect of single miRNA or miRNA cluster  
484 modulation vs scramble oligonucleotide treated cells on E-cadherin (A), Beta-catenin  
485 (B) and Slug (C). Average $\pm$ sd of three independent experiments for each cell line are  
486 shown. T-test p-value<0.01(\*\*), <0.05(\*).

487

488 **Fig.7 Effect of miRNA modulation on mammosphere (MM) formation ability.**

489 MiRNA-modulated MDA-MB-231 were used for MM assay. Pictures of miRNA  
490 cluster-treated vs scramble oligonucleotide-treated cells were taken after 10 days of  
491 MM formation.

492

493

494

495

496 **6. References**

- 497 1. Hanahan, D. & Weinberg, R. A. Hallmarks of Cancer: The Next Generation. *Cell* **144**,  
498 646–674 (2011).
- 499 2. Cimmino, A. *et al.* miR-15 and miR-16 induce apoptosis by targeting BCL2. *Proc. Natl.*  
500 *Acad. Sci. U. S. A.* **102**, 13944–13949 (2005).
- 501 3. Calin, G. A. *et al.* Frequent deletions and down-regulation of micro- RNA genes miR15  
502 and miR16 at 13q14 in chronic lymphocytic leukemia. *Proc. Natl. Acad. Sci. U. S. A.* **99**,  
503 15524–15529 (2002).
- 504 4. Ma, L., Teruya-Feldstein, J. & Weinberg, R. A. Tumour invasion and metastasis initiated  
505 by microRNA-10b in breast cancer. *Nature* **449**, 682–688 (2007).
- 506 5. Valastyan, S. *et al.* A pleiotropically acting microRNA, miR-31, inhibits breast cancer  
507 metastasis. *Cell* **137**, 1032–1046 (2009).
- 508 6. Brabletz, S. & Brabletz, T. The ZEB/miR-200 feedback loop--a motor of cellular plasticity  
509 in development and cancer? *EMBO Rep.* **11**, 670–677 (2010).
- 510 7. Yang, D. *et al.* Integrated Analyses Identify a Master MicroRNA Regulatory Network for  
511 the Mesenchymal Subtype in Serous Ovarian Cancer. *Cancer Cell* **23**, 186–199 (2013).
- 512 8. Rooj, A. K. *et al.* MicroRNA-Mediated Dynamic Bidirectional Shift between the  
513 Subclasses of Glioblastoma Stem-like Cells. *Cell Rep.* **19**, 2026–2032 (2017).
- 514 9. Dvinge, H. *et al.* The shaping and functional consequences of the microRNA landscape  
515 in breast cancer. *Nature* **497**, 378–382 (2013).
- 516 10. Farazi, T. A. *et al.* Identification of distinct miRNA target regulation between breast  
517 cancer molecular subtypes using AGO2-PAR-CLIP and patient datasets. *Genome Biol.*  
518 **15**, R9 (2014).
- 519 11. Blenkiron, C. *et al.* MicroRNA expression profiling of human breast cancer identifies new  
520 markers of tumor subtype. *Genome Biol.* **8**, R214 (2007).
- 521 12. Mestdagh, P. *et al.* The miR-17-92 microRNA cluster regulates multiple components of  
522 the TGF- $\beta$  pathway in neuroblastoma. *Mol. Cell* **40**, 762–773 (2010).



- 523 13. Mu, P. *et al.* Genetic dissection of the miR-17~92 cluster of microRNAs in Myc-induced  
524 B-cell lymphomas. *Genes Dev.* **23**, 2806–2811 (2009).
- 525 14. Mendell, J. T. miRiad roles for the miR-17-92 cluster in development and disease. *Cell*  
526 **133**, 217–222 (2008).
- 527 15. Smith, A. L. *et al.* The miR-106b-25 cluster targets Smad7, activates TGF- $\beta$  signaling,  
528 and induces EMT and tumor initiating cell characteristics downstream of Six1 in human  
529 breast cancer. *Oncogene* **31**, 5162–5171 (2012).
- 530 16. Dentelli, P. *et al.* miR-221/222 control luminal breast cancer tumor progression by  
531 regulating different targets. *Cell Cycle Georget. Tex* **13**, 1811–1826 (2014).
- 532 17. He, L. *et al.* A microRNA polycistron as a potential human oncogene. *Nature* **435**, 828–  
533 833 (2005).
- 534 18. Cantini, L. *et al.* A review of computational approaches detecting microRNAs involved in  
535 cancer. *Front. Biosci. Landmark Ed.* **22**, 1774–1791 (2017).
- 536 19. Liang, H. & Li, W.-H. MicroRNA regulation of human protein protein interaction network.  
537 *RNA N. Y. N* **13**, 1402–1408 (2007).
- 538 20. Wang, Y., Luo, J., Zhang, H. & Lu, J. microRNAs in the Same Clusters Evolve to  
539 Coordinately Regulate Functionally Related Genes. *Mol. Biol. Evol.* **33**, 2232–2247  
540 (2016).
- 541 21. Hausser, J. & Zavolan, M. Identification and consequences of miRNA–target interactions  
542 — beyond repression of gene expression. *Nat. Rev. Genet.* **15**, 599–612 (2014).
- 543 22. Xu, J. *et al.* MiRNA-miRNA synergistic network: construction via co-regulating functional  
544 modules and disease miRNA topological features. *Nucleic Acids Res.* **39**, 825–836  
545 (2011).
- 546 23. Song, R., Catchpole, D. R., Kennedy, P. J. & Li, J. Identification of lung cancer miRNA-  
547 miRNA co-regulation networks through a progressive data refining approach. *J. Theor.*  
548 *Biol.* **380**, 271–279 (2015).

- 549 24. Tsang, J. S., Ebert, M. S. & van Oudenaarden, A. Genome-wide dissection of microRNA  
550 functions and cotargeting networks using gene set signatures. *Mol. Cell* **38**, 140–153  
551 (2010).
- 552 25. Cantini, L. *et al.* MicroRNA–mRNA interactions underlying colorectal cancer molecular  
553 subtypes. *Nat. Commun.* **6**, 8878 (2015).
- 554 26. Cantini, L. *et al.* MMRA MicroRNA Master Regulator Analysis. *Protoc. Exch.* (2015).  
555 doi:10.1038/protex.2015.122
- 556 27. Baskerville, S. & Bartel, D. P. Microarray profiling of microRNAs reveals frequent  
557 coexpression with neighboring miRNAs and host genes. *RNA N. Y. N* **11**, 241–247  
558 (2005).
- 559 28. Saini, H. K., Griffiths-Jones, S. & Enright, A. J. Genomic analysis of human microRNA  
560 transcripts. *Proc. Natl. Acad. Sci. U. S. A.* **104**, 17719–17724 (2007).
- 561 29. Oszolak, F. *et al.* Chromatin structure analyses identify miRNA promoters. *Genes Dev.*  
562 **22**, 3172–3183 (2008).
- 563 30. Rajewsky, N. microRNA target predictions in animals. *Nat. Genet.* **38 Suppl**, S8-13  
564 (2006).
- 565 31. Wang, J. *et al.* Regulatory coordination of clustered microRNAs based on microRNA-  
566 transcription factor regulatory network. *BMC Syst. Biol.* **5**, 199 (2011).
- 567 32. Margolin, A. A. *et al.* ARACNE: An Algorithm for the Reconstruction of Gene Regulatory  
568 Networks in a Mammalian Cellular Context. *BMC Bioinformatics* **7**, S7 (2006).
- 569 33. He, J., Zhou, Z., Reed, M. & Califano, A. Accelerated parallel algorithm for gene network  
570 reverse engineering. *BMC Syst. Biol.* **11**, 83 (2017).
- 571 34. Maire, V. *et al.* TTK/hMPS1 is an attractive therapeutic target for triple-negative breast  
572 cancer. *PLoS One* **8**, e63712 (2013).
- 573 35. Maire, V. *et al.* Polo-like kinase 1: a potential therapeutic option in combination with  
574 conventional chemotherapy for the management of patients with triple-negative breast  
575 cancer. *Cancer Res.* **73**, 813–823 (2013).

- 576 36. Cancer Genome Atlas Network. Comprehensive molecular portraits of human breast  
577 tumours. *Nature* **490**, 61–70 (2012).
- 578 37. Marisa, L. *et al.* Gene expression classification of colon cancer into molecular subtypes:  
579 characterization, validation, and prognostic value. *PLoS Med.* **10**, e1001453 (2013).
- 580 38. Shiah, S.-G. *et al.* Downregulated miR329 and miR410 promote the proliferation and  
581 invasion of oral squamous cell carcinoma by targeting Wnt-7b. *Cancer Res.* **74**, 7560–  
582 7572 (2014).
- 583 39. Formosa, A. *et al.* MicroRNAs, miR-154, miR-299-5p, miR-376a, miR-376c, miR-377,  
584 miR-381, miR-487b, miR-485-3p, miR-495 and miR-654-3p, mapped to the 14q32.31  
585 locus, regulate proliferation, apoptosis, migration and invasion in metastatic prostate  
586 cancer cells. *Oncogene* **33**, 5173–5182 (2014).
- 587 40. Hill, K. E. *et al.* An imprinted non-coding genomic cluster at 14q32 defines clinically  
588 relevant molecular subtypes in osteosarcoma across multiple independent datasets. *J.*  
589 *Hematol. Oncol.* *J Hematol Oncol* **10**, 107 (2017).
- 590 41. Uppal, A. *et al.* 14q32-encoded microRNAs mediate an oligometastatic phenotype.  
591 *Oncotarget* **6**, 3540–3552 (2015).
- 592 42. Zhang, L. *et al.* Genomic and epigenetic alterations deregulate microRNA expression in  
593 human epithelial ovarian cancer. *Proc. Natl. Acad. Sci.* **105**, 7004–7009 (2008).
- 594 43. Zehavi, L. *et al.* Silencing of a large microRNA cluster on human chromosome 14q32 in  
595 melanoma: biological effects of mir-376a and mir-376c on insulin growth factor 1  
596 receptor. *Mol. Cancer* **11**, 44 (2012).
- 597 44. Chang, Y.-Y. *et al.* Deregulated microRNAs in triple-negative breast cancer revealed by  
598 deep sequencing. *Mol. Cancer* **14**, 36 (2015).
- 599 45. Liu, B. *et al.* MiR-502/SET8 regulatory circuit in pathobiology of breast cancer. *Cancer*  
600 *Lett.* **376**, 259–267 (2016).
- 601 46. Smith, S. E. *et al.* Molecular characterization of breast cancer cell lines through multiple  
602 omic approaches. *Breast Cancer Res.* **19**, (2017).

- 603 47. Dontu, G. *et al.* In vitro propagation and transcriptional profiling of human mammary  
604 stem/progenitor cells. *Genes Dev.* **17**, 1253–1270 (2003).
- 605 48. Gupta, G. P. & Massagué, J. Cancer Metastasis: Building a Framework. *Cell* **127**, 679–  
606 695 (2006).
- 607 49. Altuvia, Y. *et al.* Clustering and conservation patterns of human microRNAs. *Nucleic*  
608 *Acids Res.* **33**, 2697–2706 (2005).
- 609 50. Marco, A., Ninova, M., Ronshaugen, M. & Griffiths-Jones, S. Clusters of microRNAs  
610 emerge by new hairpins in existing transcripts. *Nucleic Acids Res.* **41**, 7745–7752  
611 (2013).
- 612 51. Martignetti, L. *et al.* Detection of miRNA regulatory effect on triple negative breast cancer  
613 transcriptome. *BMC Genomics* **16**, S4 (2015).
- 614 52. Parker, J. S. *et al.* Supervised risk predictor of breast cancer based on intrinsic subtypes.  
615 *J. Clin. Oncol. Off. J. Am. Soc. Clin. Oncol.* **27**, 1160–1167 (2009).
- 616 53. Hoshida, Y. Nearest template prediction: a single-sample-based flexible class prediction  
617 with confidence assessment. *PloS One* **5**, e15543 (2010).
- 618 54. Isella, C. *et al.* Stromal contribution to the colorectal cancer transcriptome. *Nat. Genet.*  
619 **47**, 312–319 (2015).
- 620 55. Sadanandam, A. *et al.* A colorectal cancer classification system that associates cellular  
621 phenotype and responses to therapy. *Nat. Med.* **19**, 619–625 (2013).
- 622 56. Liberzon, A. *et al.* Molecular signatures database (MSigDB) 3.0. *Bioinformatics* **27**,  
623 1739–1740 (2011).
- 624 57. Whitfield, M. L., George, L. K., Grant, G. D. & Perou, C. M. Common markers of  
625 proliferation. *Nat. Rev. Cancer* **6**, 99–106 (2006).
- 626 58. Kozomara, A. & Griffiths-Jones, S. miRBase: annotating high confidence microRNAs  
627 using deep sequencing data. *Nucleic Acids Res.* **42**, D68–D73 (2014).
- 628 59. Platonova, N. *et al.* TBX3, the gene mutated in ulnar-mammary syndrome, promotes  
629 growth of mammary epithelial cells via repression of p19ARF, independently of p53. *Cell*  
630 *Tissue Res.* **328**, 301–316 (2007).

631 60. Bertoli, G. *et al.* MicroRNA-567 dysregulation contributes to carcinogenesis of breast  
632 cancer, targeting tumor cell proliferation, and migration. *Breast Cancer Res. Treat.* **161**,  
633 605–616 (2017).

634 61. Shaw, F. L. *et al.* A Detailed Mammosphere Assay Protocol for the Quantification of  
635 Breast Stem Cell Activity. *J. Mammary Gland Biol. Neoplasia* **17**, 111–117 (2012).

636

## 637 **7. Acknowledgments**

638 This work was partly supported by ITMO Cancer within the framework of the Plan  
639 Cancer 2014–2019 and convention Biologie des Systèmes N°BIO2015–01 (M5  
640 project).

## 641 **8. Authors' contribution**

642 Conceptualization, LC and LM; Data acquisition: LC, TD, GB and IC; Methodology,  
643 LC, GB, CC, IC, MC and LM; Validation, GB, CC, IC; Resources, EB and IC;  
644 Supervision, EB, IC and LM; Writing – Original Draft, LC, GB and LM; Writing –  
645 Review & Editing, LC, GB, CC, IC, TD, MC, AZ, EB and LM.

## 646 **9. Supplementary files**

647 **Supp. File S1.** Supplementary Tables S1-S4

**Initial input:**

1. Paired microRNA/mRNA expression dataset
2. Classification of the samples into subtypes
3. Subtype-specific mRNA expression signatures

*Procedure*

*Output*

**STEP 1:**  
Clustered microRNAs  
differential expression  
analysis

Clustered microRNAs with  
subtype-specific  
expression

**STEP 2:**  
Clustered microRNAs  
target enrichment analysis

Clustered microRNAs  
whose predicted target  
mRNAs are enriched in  
subtype signature genes

**STEP 3:**  
network analysis

Clustered microRNAs  
whose mRNA 'regulon' is  
enriched in subtype  
signature genes

**Final output:**

Clustered microRNAs with subtype-specific expression  
and providing a significant contribution to the  
expression of subtype signature genes.

# miR-199a/214

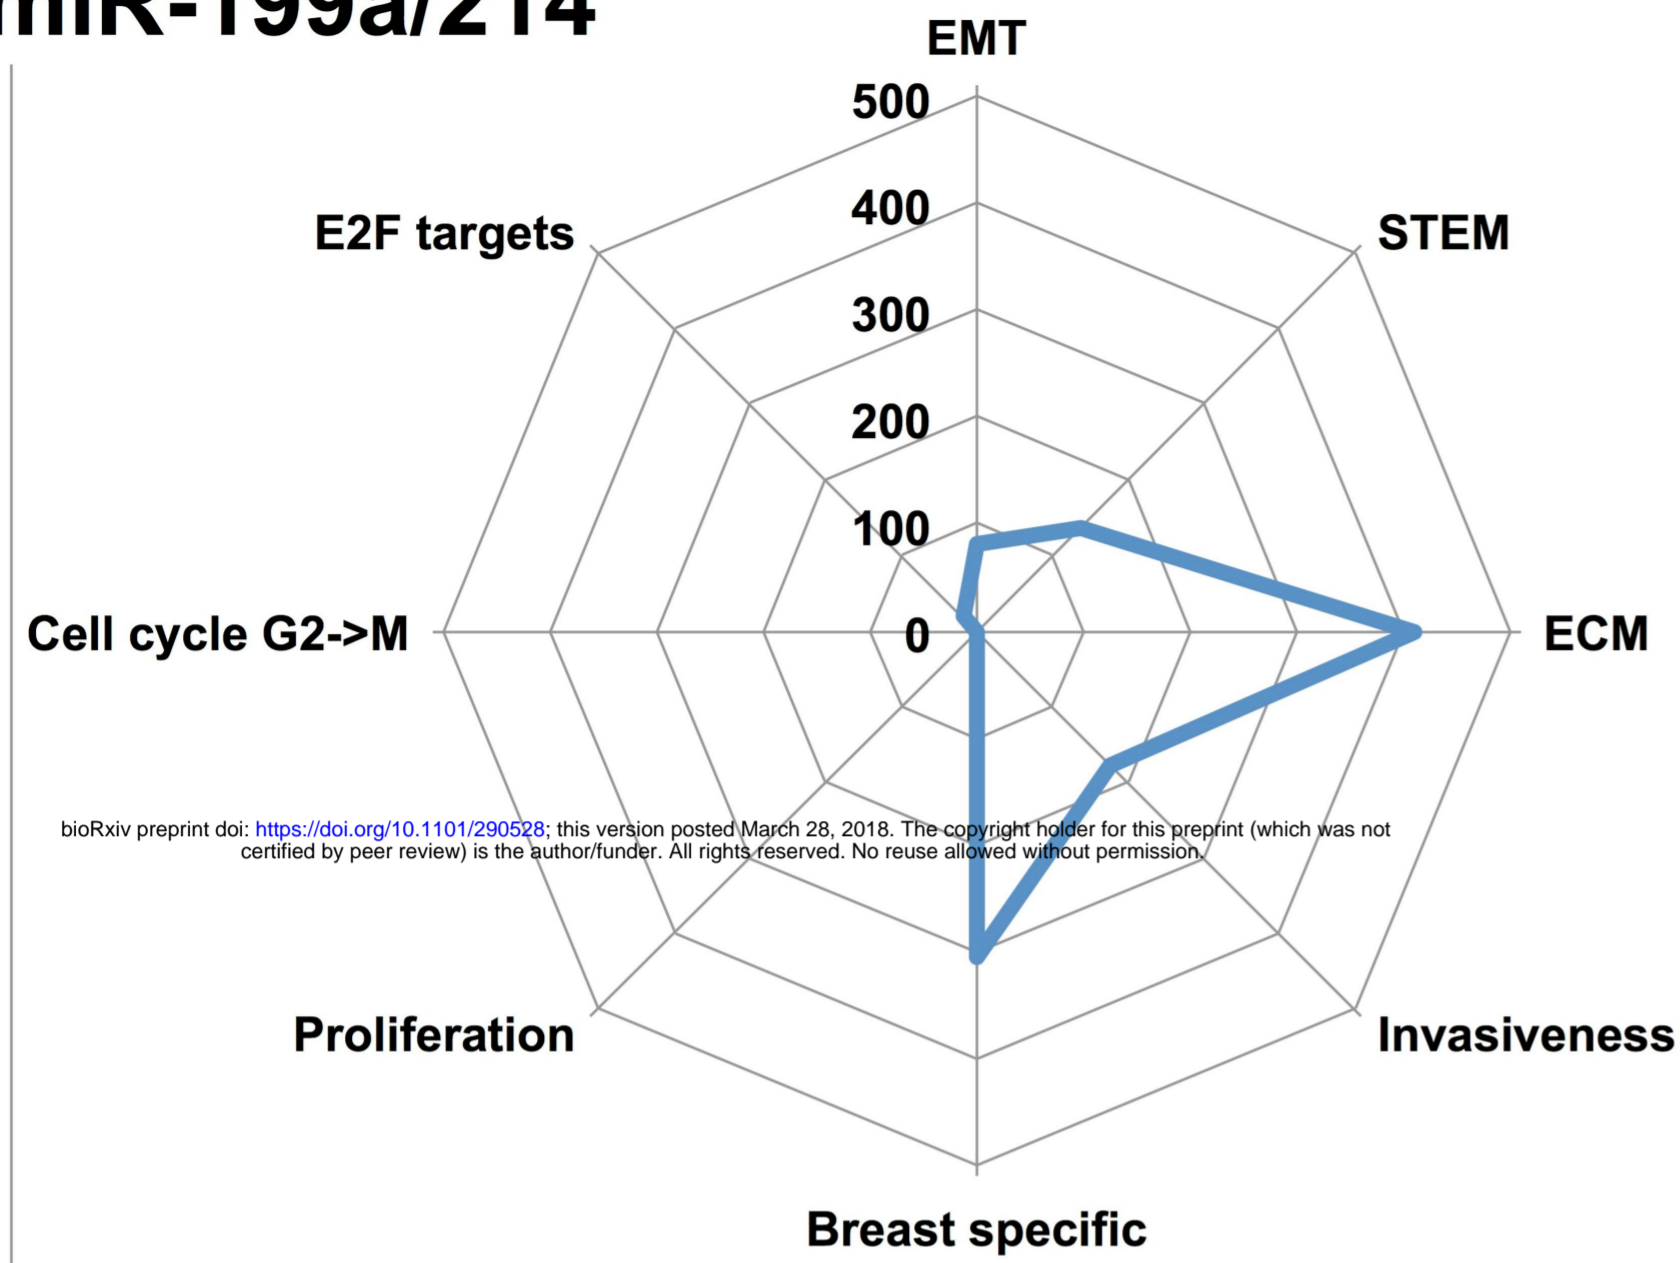

# miR-493/136

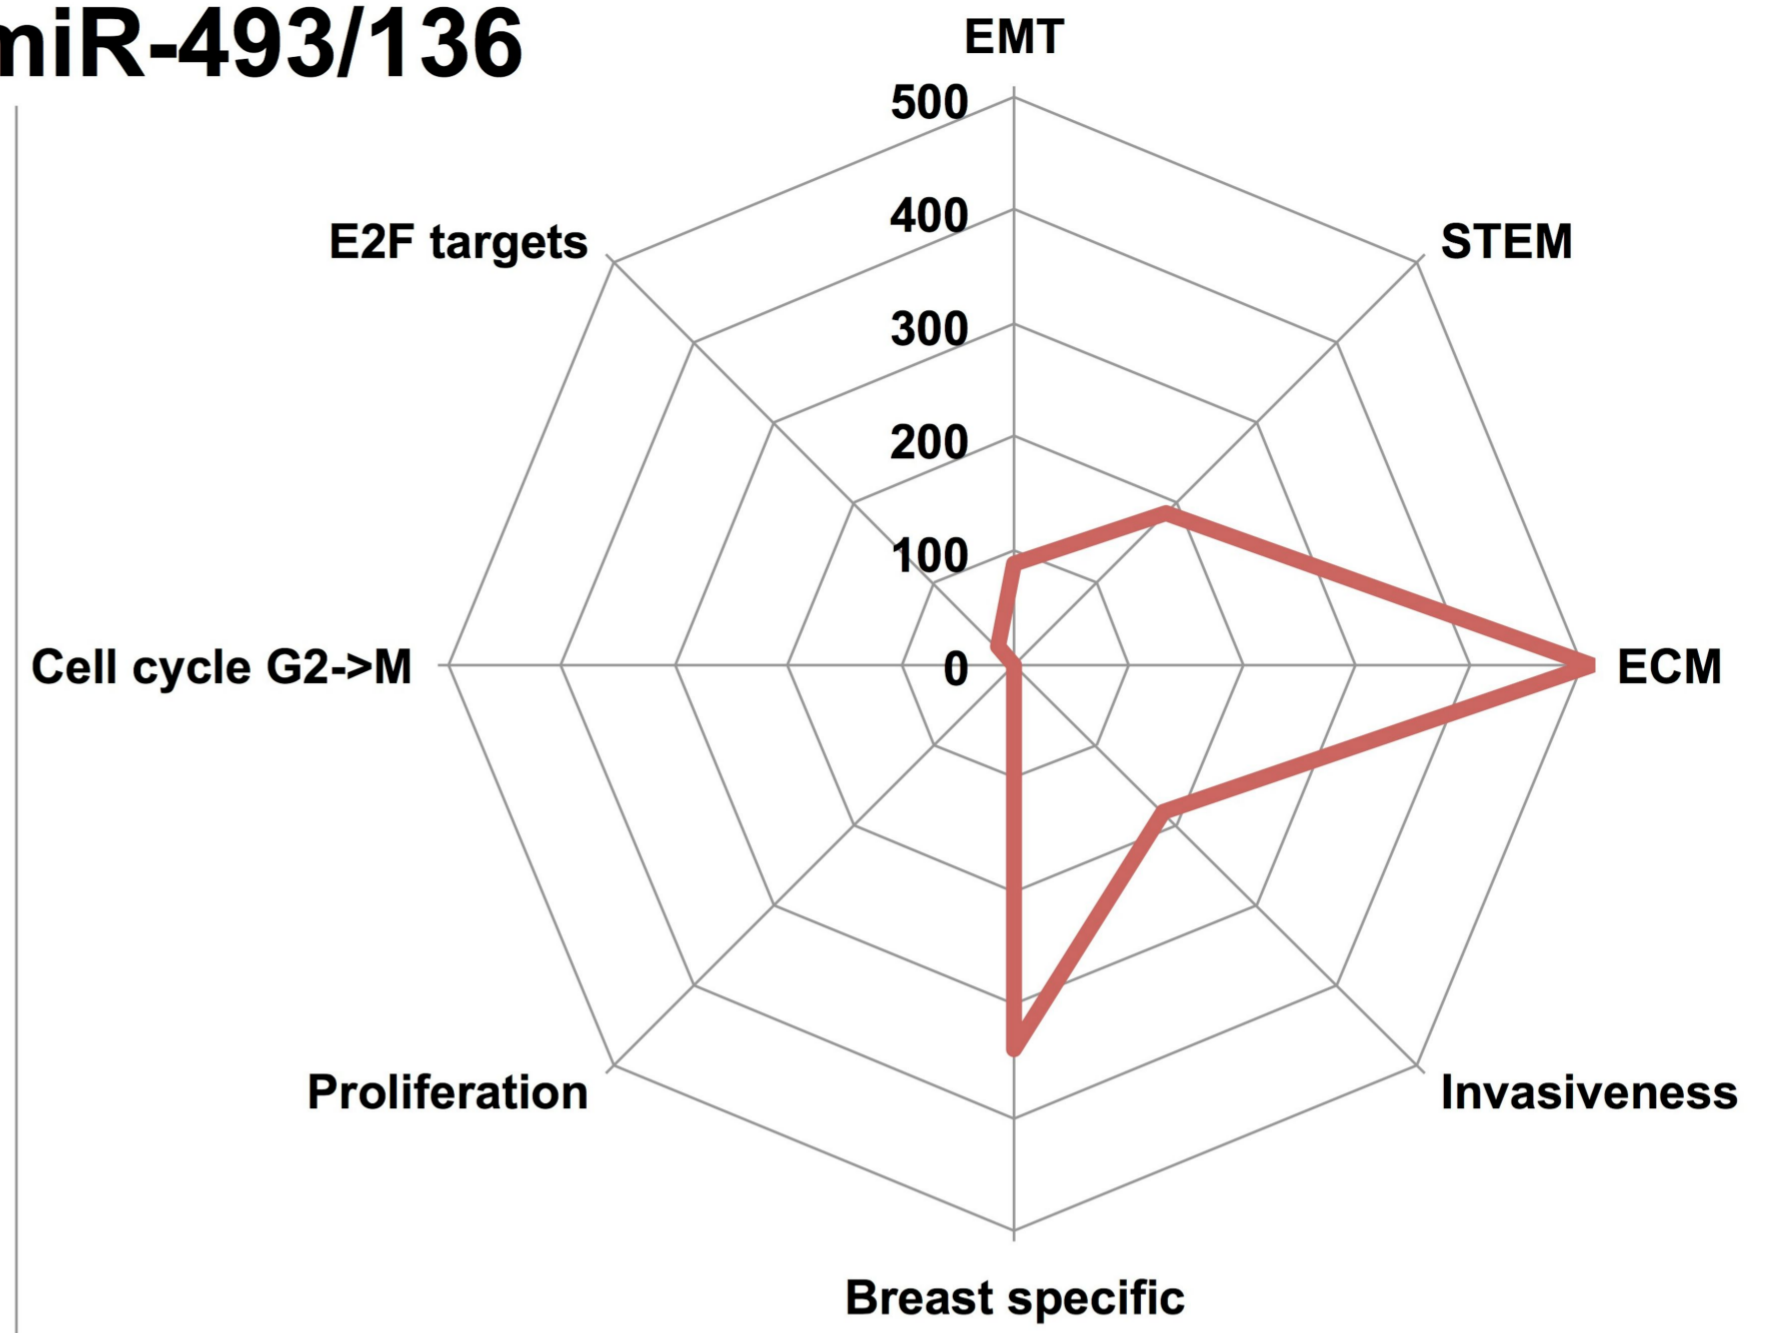

# miR-379/656

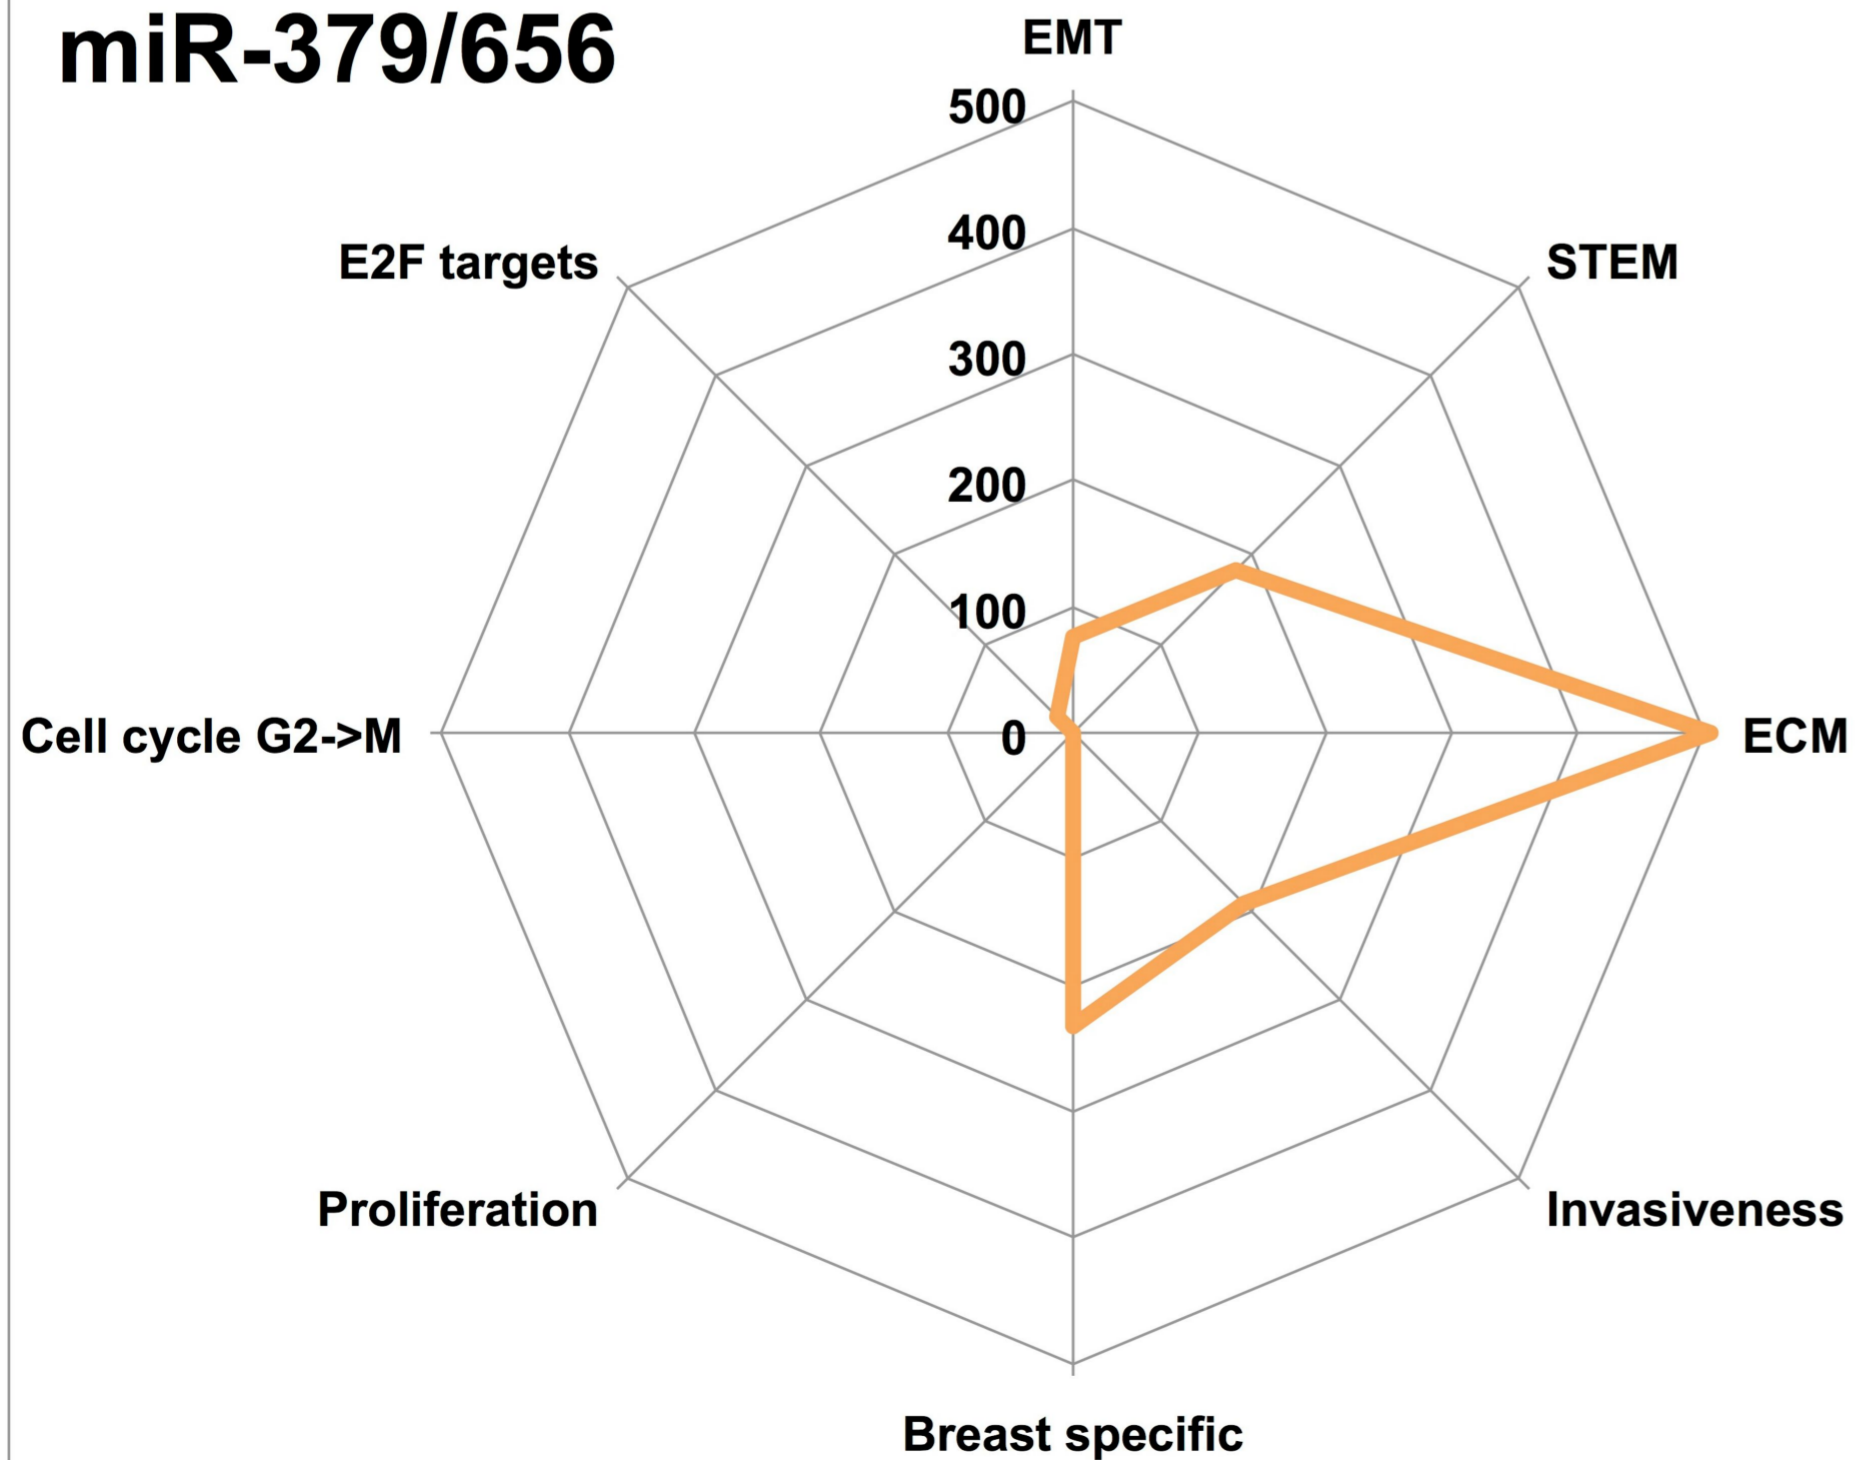

# miR-532/502

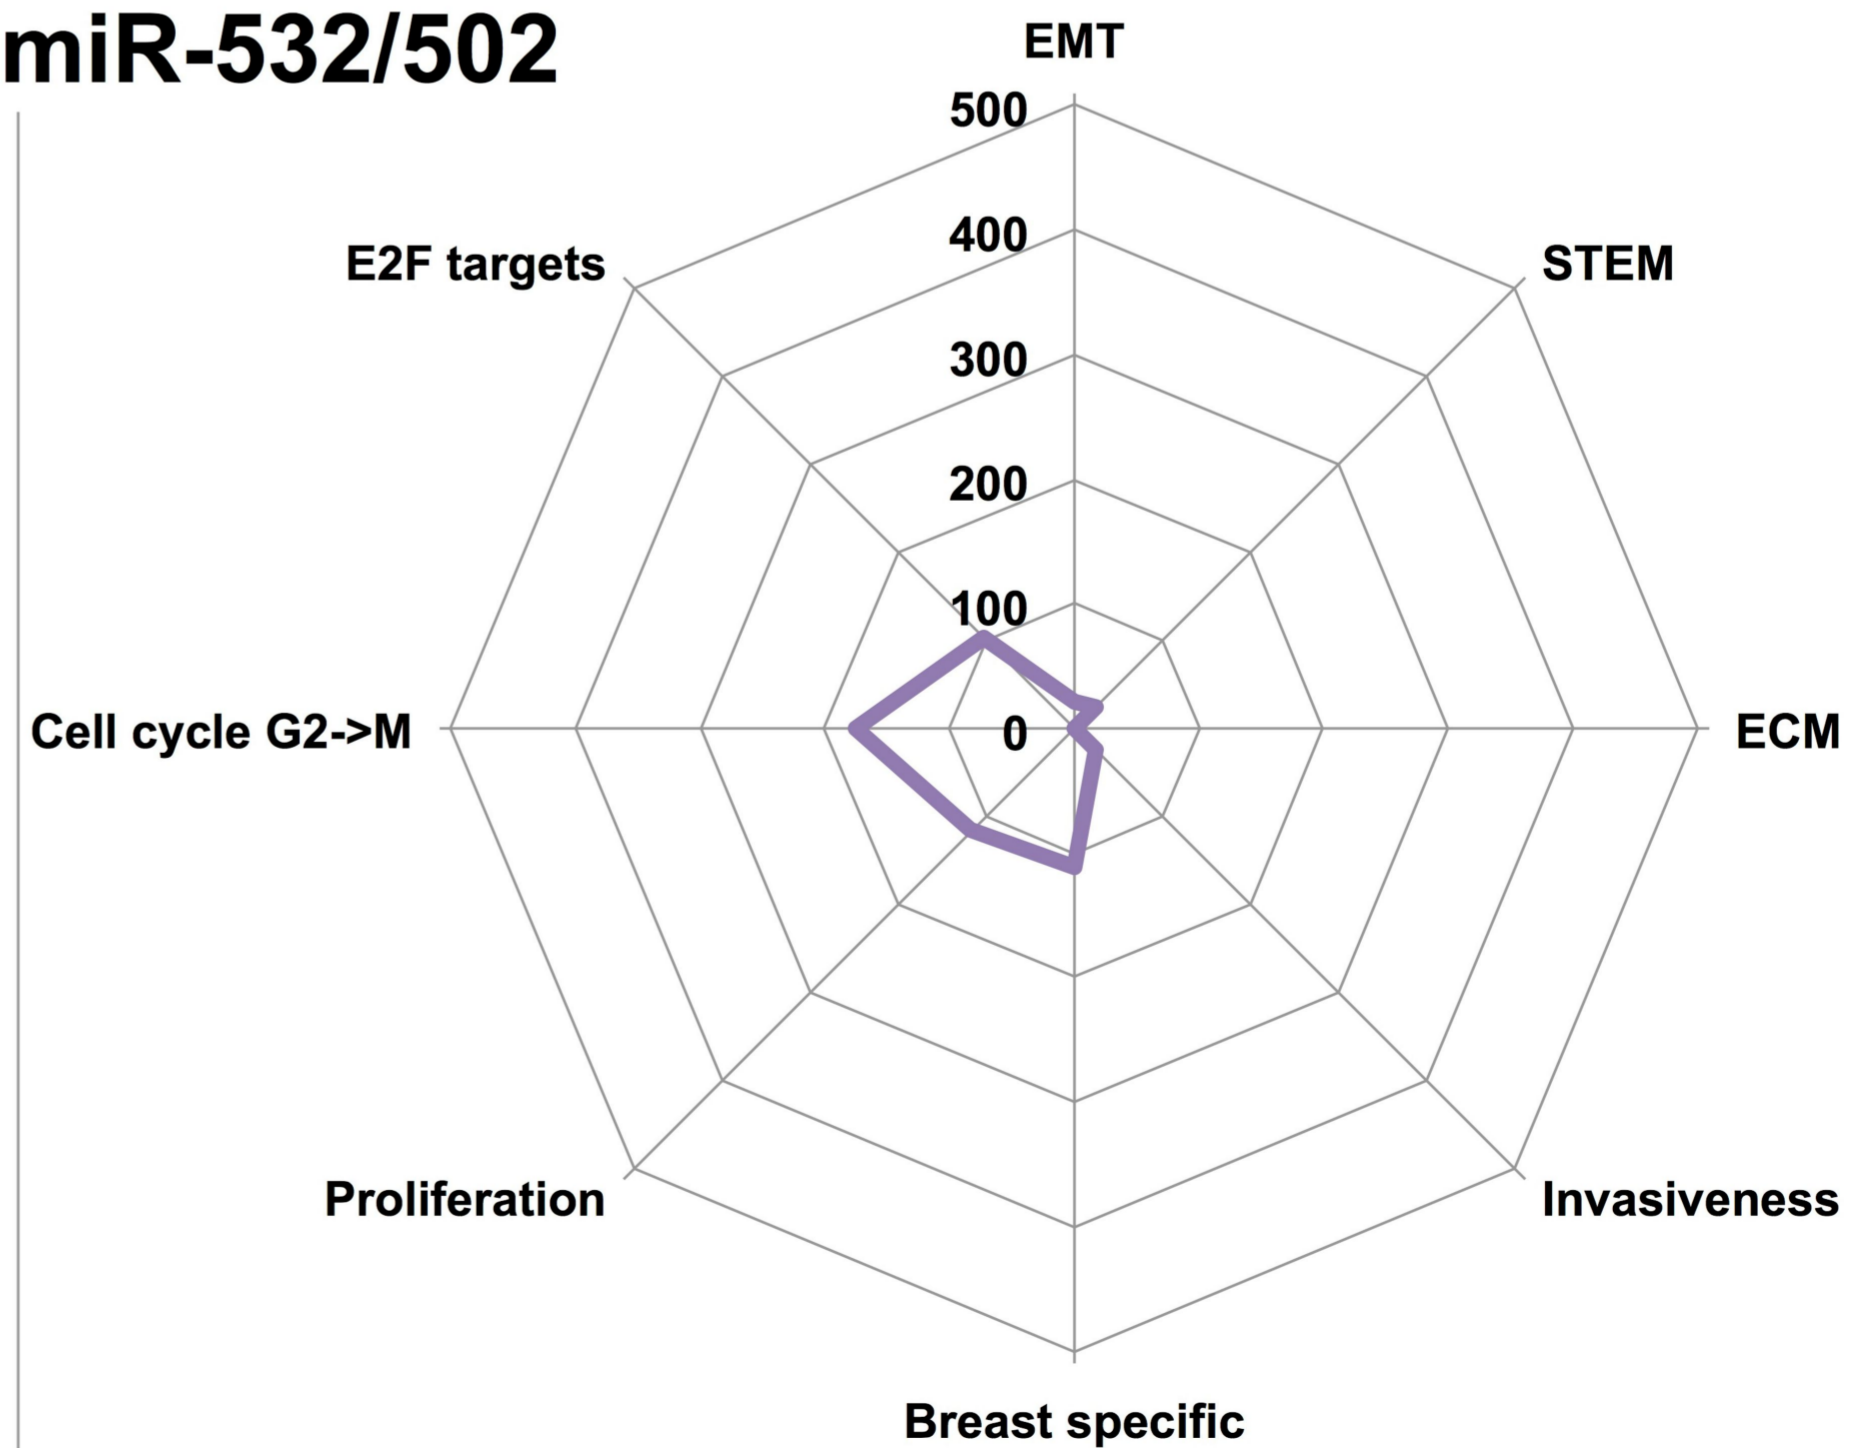

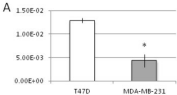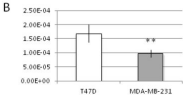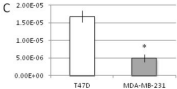



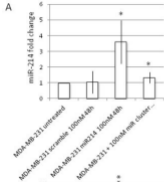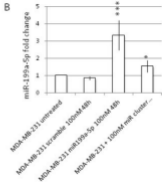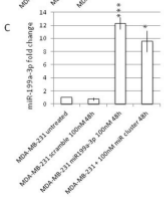

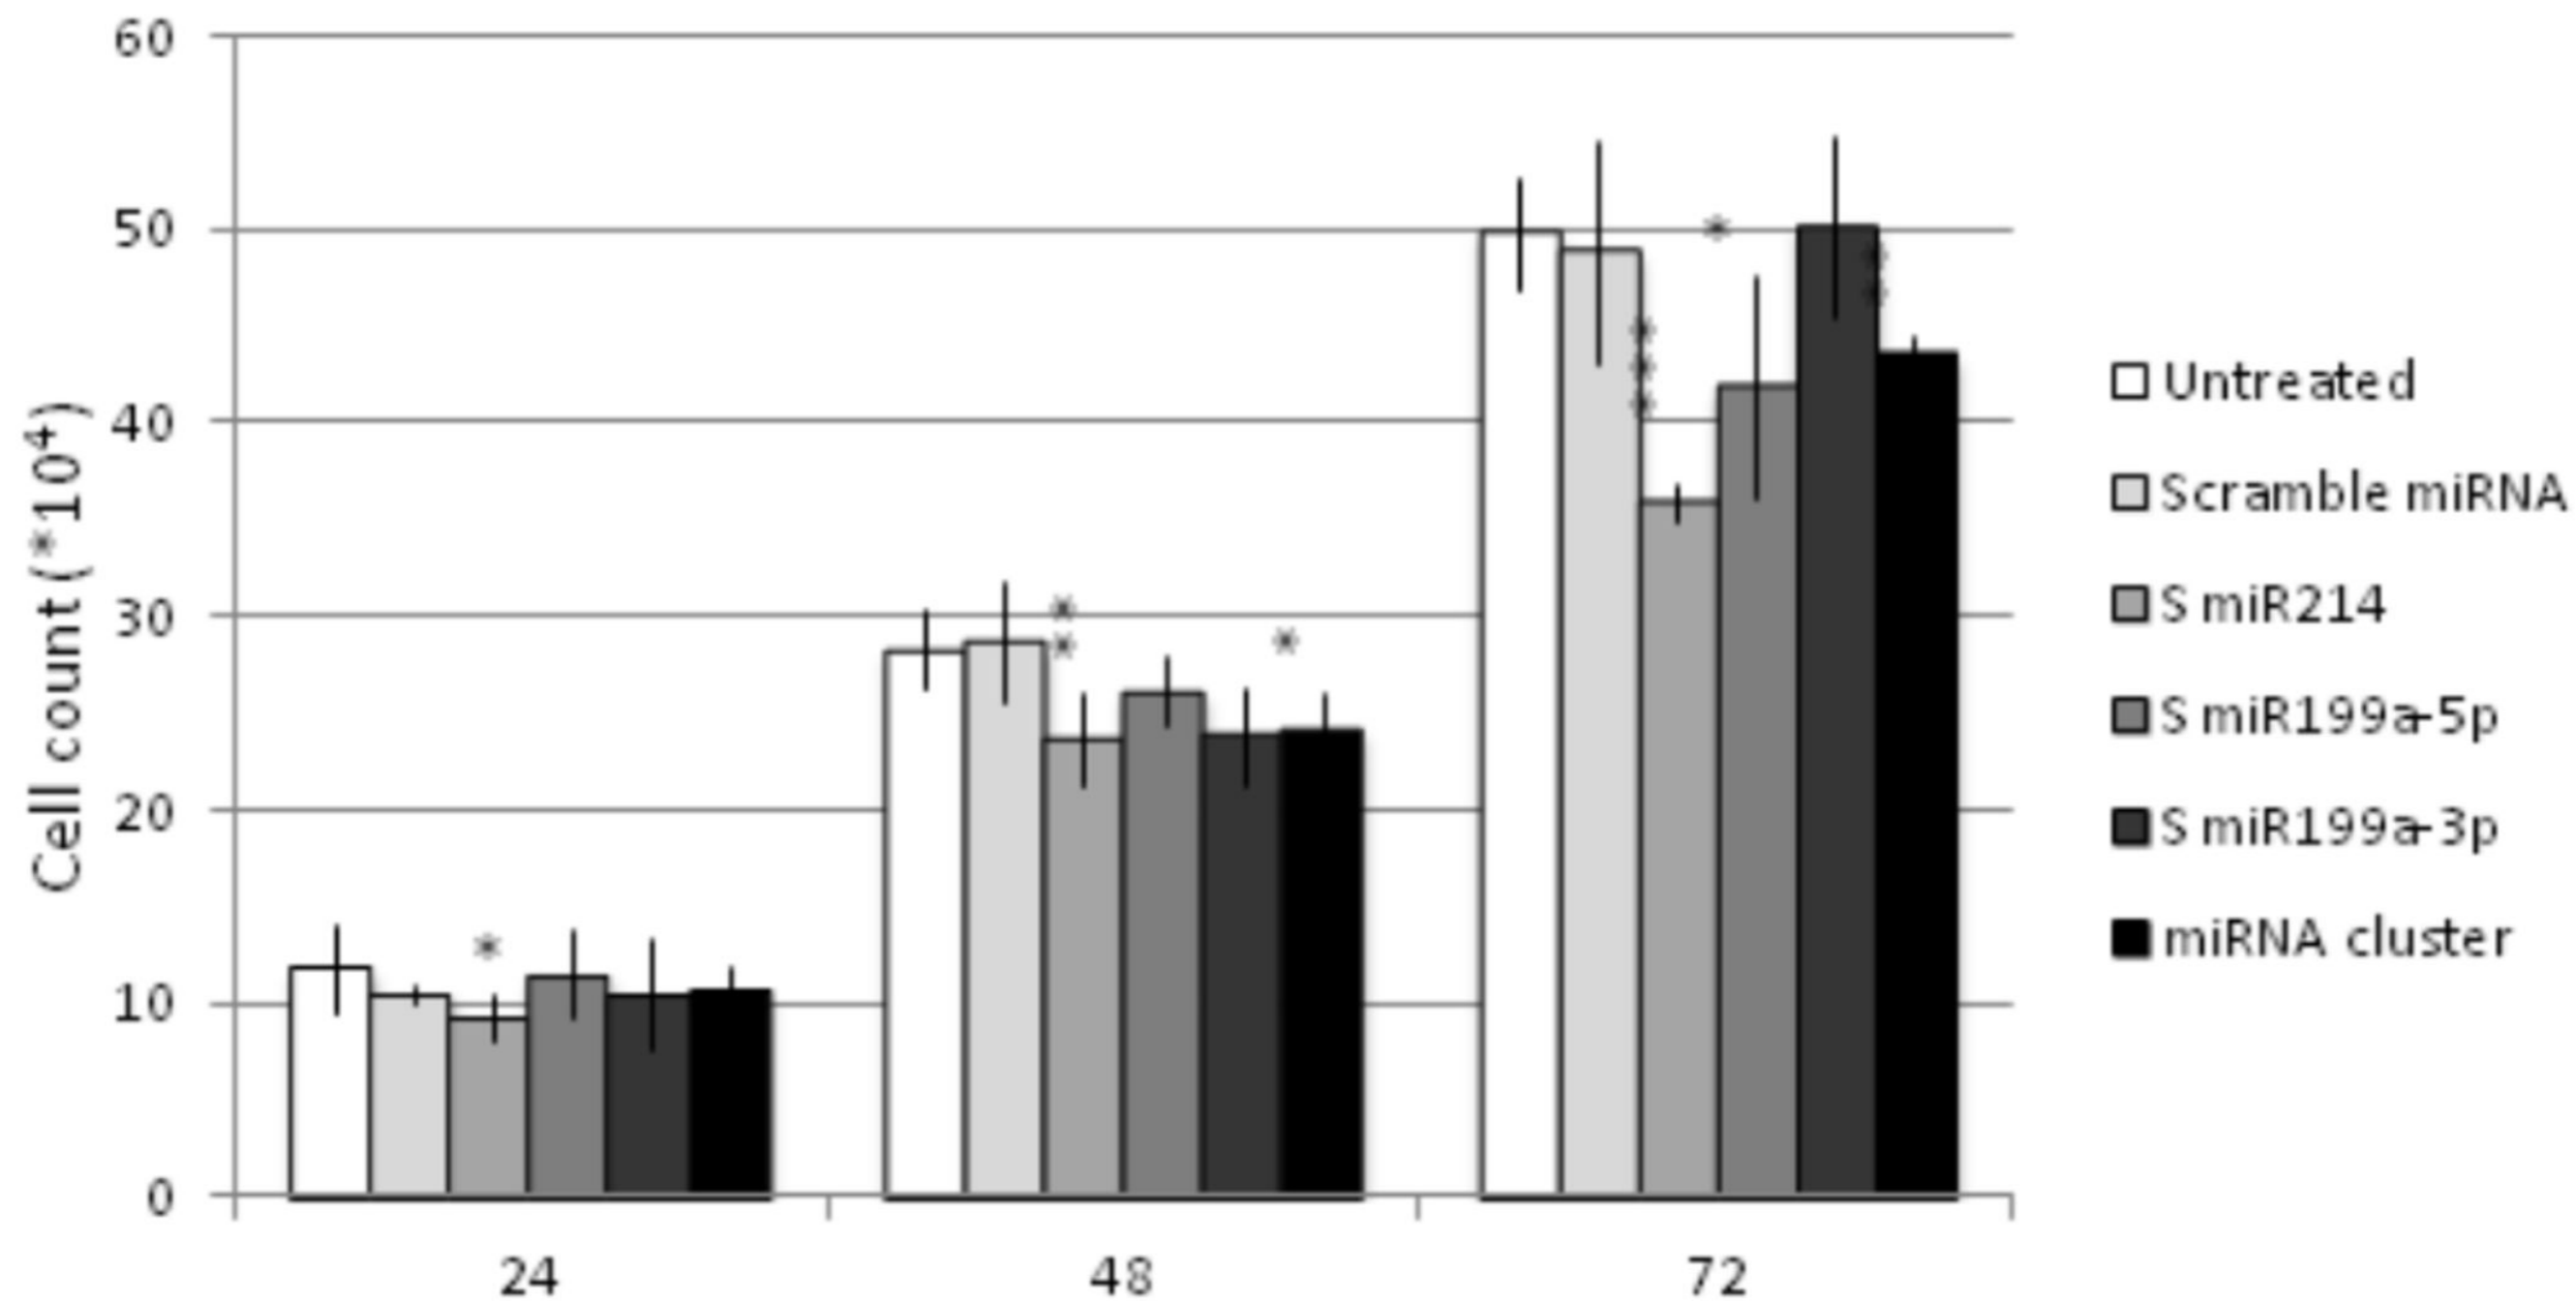

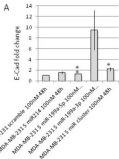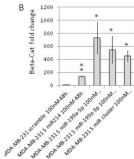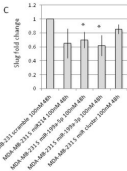

## Mammosphere from MDA-MB-231 (10 days)

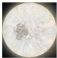

Untreated

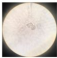

Scramble

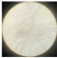

5 miR214

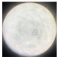

5 miR199a-5p

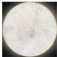

5 miR199a-3p

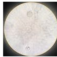

miR cluster
